# Supplementary material
Source: Royal Society of Chemistry journal article supplement (doi:10.1039/d6qi00400h)
Supplement: d6qi00400h1.pdf [file d6qi00400h1.pdf]

## Supporting Information

### High-Temperature Biferroicity in a Chiral 3D Hybrid Rare-Earth-Based Double Perovskite

Li-Ping Wang,<sup>1,2,#</sup> Chang-Chun Fan,<sup>1,3,#</sup> Zheng-Hui Hu,<sup>1,2</sup> Hong-Fei Zhao,<sup>1,2</sup> Jian-Rong Li,<sup>1,2,\*</sup> and Chao Shi<sup>1,2,\*</sup>

<sup>1</sup>Jiangxi Province Key Laboratory of Functional Crystalline Materials Chemistry, Jiangxi University of Science and Technology, Ganzhou 341000, Jiangxi Province, P.R. China.

<sup>2</sup>Chaotic Matter Science Research Center, International Institute for Innovation, Jiangxi University of Science and Technology, Nanchang, Jiangxi, 330013, China.

<sup>3</sup>School of Materials Engineering, Jinling Institute of Technology, Nanjing 211169, P.R. China.

# These authors contributed equally to this work.

\*E-mail: jrli@fjirsm.ac.cn; 13064147687@163.com.

## Supplementary Index

### Experimental

General Measurements.

X-ray diffraction experiments.

### Note

Note S1:

### Supplemental Figures

**Figure S1.** PXRD patterns of **1** at room temperature.

**Figure S2.** The thermogravimetric (TG) curves of **1**.

**Figure S3.** DSC curves of **1** measured a cooling-heating cycle with different scanning rates.

**Figure S4.** Measurement of PXRD patterns of LTP, ITP, and HTP of **1**.

**Figure S5.** The SHG intensity of **1** is compared with that of the standard reference material KDP at room temperature.

**Figure S6.** Plot of SHG intensity obtained for switching experiment of **1** with  $dT/dt = 30 \text{ K min}^{-1}$  between 330 and 440 K.

**Figure S7.** Switchable  $T$ - $\epsilon'$  curves of **1** measured at 500 Hz to 1 MHz.

### Supplemental Tables

**Table S1** The elemental analysis for **1**.

**Table S2.** Crystal data and refinement detail of **1** at 293 K, 390 K, and 428 K.

**Table S3.** The  $T_c$  based on organic, inorganic and other hybrid perovskite ferroelectrics and reported cases of this work.

**Table S4.** Selected bond lengths [ $\text{\AA}$ ] and angles [ $^\circ$ ] at 293 K, 390 K, and 428 K.

## Experimental section

### General Measurements.

Powder X-ray Diffraction (PXRD) patterns were collected on a Rigaku D/MAX 2000 PC diffractometer, utilizing Cu K $\alpha$  radiation ( $\lambda = 0.15406$  nm) with a scanning range of 5°–50° and a rate of 5° min<sup>-1</sup>. Thermogravimetric (TG) analysis was conducted under a nitrogen atmosphere using a NETZSCH STA2500 instrument at a heating rate of 10 K min<sup>-1</sup>; approximately 10 mg of powdered compound 1 was loaded into an aluminum crucible for this purpose. Differential scanning calorimetry (DSC) experiments were performed in a nitrogen environment with a DSC 214 Polyma apparatus, maintaining a heating/cooling rate of 10 K min<sup>-1</sup>. Dielectric measurements on compound 1 were executed using a Tonghui TH2828A impedance analyzer. The polycrystalline samples were pressed into pellets and sputtered with silver electrodes. The temperature-dependent complex dielectric permittivity ( $\epsilon_r = \epsilon' - i\epsilon''$ ) was recorded across the frequency range of 500 Hz to 1000 kHz at temperatures between 260 K and 385 K. Ferroelastic domains were observed under an Olympus BX51TRF optical polarizing microscope, with temperature control maintained to within 0.2 K via an INSTRON HCC602 stage. Second harmonic generation (SHG) signals were measured using a pulsed Nd:YAG laser source (1064 nm, 5 ns pulses, 1.6 MW peak power, 10 Hz repetition rate). Variable-temperature ferroelectric P–E hysteresis loops were obtained on thin crystals (0.65 mm  $\times$  0.10 mm) using a Radiant Precision Premier II system. Ferroelectric switching behavior was characterized via resonance-enhanced piezoresponse force microscopy (PFM) using an MFP-3D system (Asylum Research) with conductive Pt/Ir coated silicon probes (EFM-50, Nanoworld). Ultraviolet-visible (UV-Vis) absorption spectra were acquired on a Shimadzu UV-3600i Plus spectrometer (Japan) from 200 to 800 nm. Both steady-state emission spectra and time-resolved fluorescence lifetimes were determined using a FluoroLog 3-TCSPEC spectrofluorometer (Horiba Jobin Yvon Inc).

### X-ray diffraction experiments.

Variable-temperature X-ray diffraction experiments were performed utilizing a Rigaku Synergy diffractometer equipped with Mo-K $\alpha$  radiation ( $\lambda = 0.71073$  Å). The

processes of data collection, cell refinement, and data reduction were accomplished with the CrysAlisPro (v1.171.41.112a) XtaLAB Synergy-R online platform. Crystal structures were determined via direct methods and refined via full-matrix least-squares on  $F^2$  with the OLEX2 software suite. Anisotropic refinement was applied to all non-hydrogen atoms, whereas hydrogen atom positions were set based on geometric calculations. Complete crystallographic details can be found in **Tables S1,S3**. Deposition of the crystal structure files (CIF) has been made with the Cambridge Crystal Data Center (**CCDC: 2445289–2445291**). Access to this material is provided free of charge by the Cambridge Crystallographic Data Centre.

## Note

### Note S1.

$$\begin{aligned} \Delta S_1 &= \int_{T_1}^{T_2} \frac{Q}{T} dT \approx \frac{\Delta H}{T_c} = \frac{6.757 \text{ J} \cdot \text{g}^{-1} \times 837.82 \text{ g} \cdot \text{mol}^{-1}}{370 \text{ K}} = \frac{11322}{370} \\ &= 15.3 \text{ J} \cdot \text{mol}^{-1} \cdot \text{K}^{-1} \end{aligned}$$

$$\Delta S_1 = R \ln N$$

$$N_1 = \exp\left(\frac{\Delta S}{R}\right) = \exp\left(\frac{15.3 \text{ J} \cdot \text{mol}^{-1} \cdot \text{K}^{-1}}{8.314 \text{ J} \cdot \text{mol}^{-1} \cdot \text{K}^{-1}}\right) = 6.300$$

$$\begin{aligned} \Delta S_2 &= \int_{T_1}^{T_2} \frac{Q}{T} dT \approx \frac{\Delta H}{T_c} = \frac{2.264 \text{ J} \cdot \text{g}^{-1} \times 837.82 \text{ g} \cdot \text{mol}^{-1}}{410.00 \text{ K}} = \frac{3793.6}{410} \\ &= 4.626 \text{ J} \cdot \text{mol}^{-1} \cdot \text{K}^{-1} \end{aligned}$$

$$\Delta S_1 = R \ln N$$

$$N_2 = \exp\left(\frac{\Delta S}{R}\right) = \exp\left(\frac{4.626 \text{ J} \cdot \text{mol}^{-1} \cdot \text{K}^{-1}}{8.314 \text{ J} \cdot \text{mol}^{-1} \cdot \text{K}^{-1}}\right) = 1.744$$

## Supplemental Figures

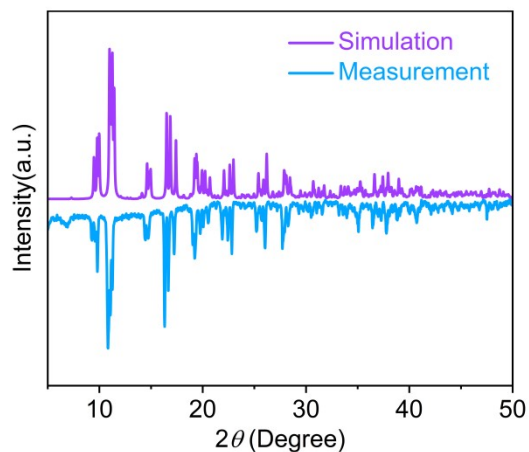

**Figure S1.** PXRD patterns of **1** were measured at room temperature.

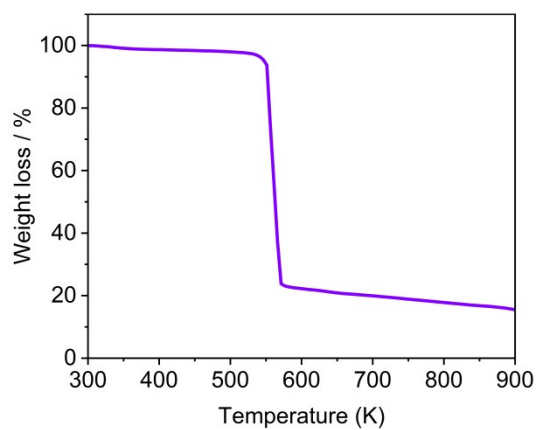

**Figure S2.** The thermogravimetric (TG) curves of **1** were recorded under a nitrogen atmosphere.

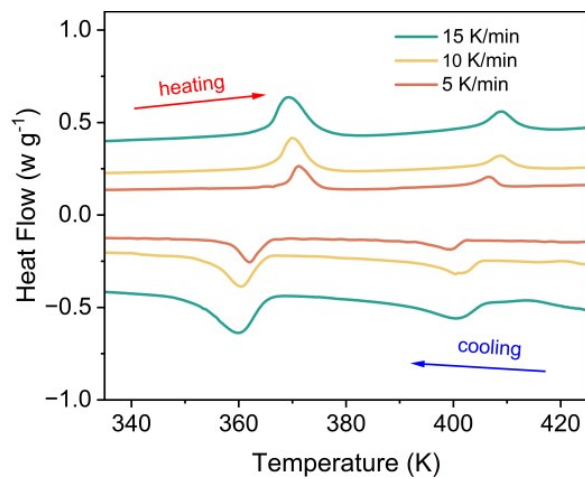

**Figure S3.** DSC curves of **1** measured a cooling-heating cycle with different scanning rates.

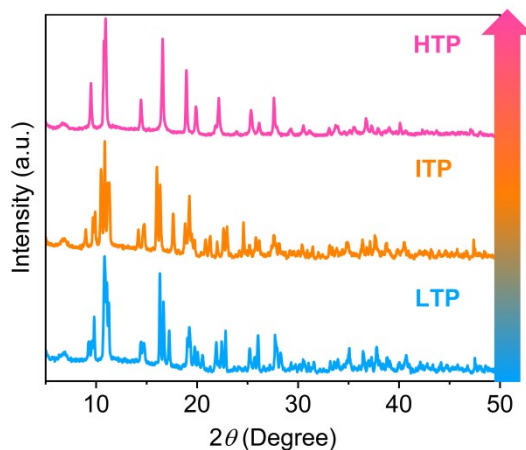

**Figure S4.** Measurement of PXRD patterns of LTP, ITP, and HTP of **1**.

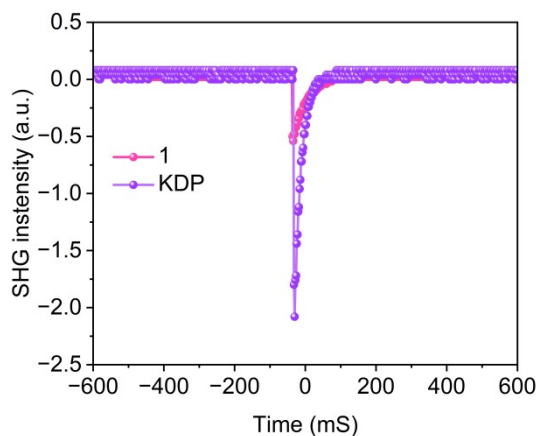

**Figure S5.** The SHG intensity of **1** is compared with that of the standard reference material KDP at room temperature.

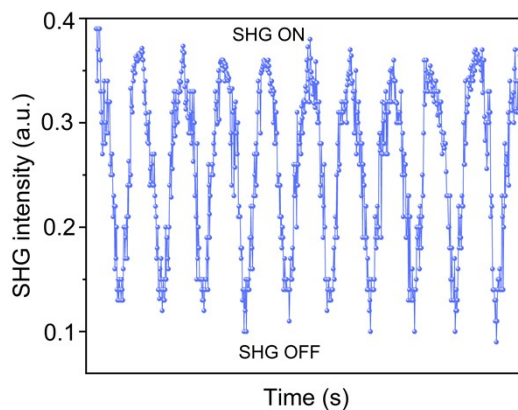

**Figure S6.** Plot of SHG intensity obtained for switching experiment of **1** with  $dT/dt = 30 \text{ K min}^{-1}$  between 330 and 440 K.

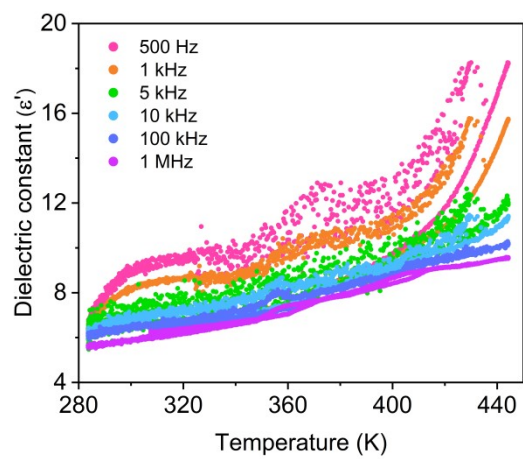

**Figure. S7** Switchable  $T$ - $\epsilon'$  curves of **1** measured at 500 Hz to 1 MHz.

## Supplemental Tables

**Table S1** The elemental analysis for **1**.

| (RM3HQ) <sub>4</sub> K <sub>2</sub> [Nd(NO <sub>3</sub> ) <sub>6</sub> ] <sub>2</sub> | Anal. (%) | Found (%) |
|---------------------------------------------------------------------------------------|-----------|-----------|
| C                                                                                     | 22.88     | 22.84     |
| H                                                                                     | 3.84      | 3.86      |
| N                                                                                     | 13.34     | 13.38     |

The description of “The element analysis for **1**. Anal. (%) calc.: C 22.88, H 3.84, N 13.34. Found (%): C 22.84, H 3.86, N 13.38.”

**Table S2.** Crystal data and refinement detail of **1** at 293 K, 390 K, and 428 K.

| <i>T</i> / K                                                                                              | <b>293</b>              | <b>390</b>              | <b>428</b>                 |
|-----------------------------------------------------------------------------------------------------------|-------------------------|-------------------------|----------------------------|
| Formula weight                                                                                            | 837.82                  | 809.77                  | 779.56                     |
| Crystal system                                                                                            | monoclinic              | monoclinic              | monoclinic                 |
| Space group                                                                                               | <i>P</i> 2 <sub>1</sub> | <i>P</i> 2 <sub>1</sub> | <i>P</i> 6 <sub>3</sub> 22 |
| <i>a</i> / Å                                                                                              | 10.1821(2)              | 9.97856(6)              | 10.6105(5)                 |
| <i>b</i> / Å                                                                                              | 15.9260(3)              | 16.0494(6)              | 10.6105(5)                 |
| <i>c</i> / Å                                                                                              | 18.6690(4)              | 10.7872(7)              | 16.2217(11)                |
| <i>α</i> / °                                                                                              | 90                      | 90                      | 90                         |
| <i>β</i> / °                                                                                              | 91.366(2)               | 116.318(7)              | 90                         |
| <i>γ</i> / °                                                                                              | 90                      | 90                      | 120                        |
| <i>V</i> / Å <sup>3</sup>                                                                                 | 3026.51(10)             | 1548.49(17)             | 1581.61(19)                |
| <i>Z</i>                                                                                                  | 4                       | 2                       | 2                          |
| <i>λ</i> / Å                                                                                              | 0.71073                 | 0.71073                 | 0.71073                    |
| <i>D</i> <sub>calc</sub> / g·cm <sup>-3</sup>                                                             | 1.839                   | 1.737                   | 1.637                      |
| <i>μ</i> / mm <sup>-1</sup>                                                                               | 1.951                   | 1.903                   | 1.859                      |
| <i>F</i> (000)                                                                                            | 1684                    | 810                     | 754                        |
| 2 <i>θ</i> range / °                                                                                      | 2.18–30.89              | 4.21–62.05              | 2.22–31.00                 |
| Reflns collected                                                                                          | 32364                   | 35254                   | 12056                      |
| Independent reflns ( <i>R</i> <sub>int</sub> )                                                            | 14093 (0.0361)          | 8099 (0.0472)           | 2610 (0.0374)              |
| No. of parameters                                                                                         | 833                     | 435                     | 173                        |
| <i>R</i> <sub>1</sub> <sup>[a]</sup> , <i>wR</i> <sub>2</sub> <sup>[b]</sup> [ <i>I</i> > 2σ( <i>I</i> )] | 0.0362, 0.0859          | 0.0742, 0.1984          | 0.0540, 0.1299             |
| <i>R</i> <sub>1</sub> , <i>wR</i> <sub>2</sub> [all data]                                                 | 0.0424, 0.0891          | 0.1085, 0.2234          | 0.1069, 0.1615             |
| GOF                                                                                                       | 1.024                   | 0.963                   | 0.956                      |
| Δ <i>ρ</i> <sup>[c]</sup> / e·Å <sup>-3</sup>                                                             | 0.96, -0.946            | 1.48, -0.87             | 0.39, -0.307               |
| CCDC                                                                                                      | 2445289                 | 2445290                 | 2445291                    |

<sup>[a]</sup>*R*<sub>1</sub> = Σ||*F*<sub>o</sub>|| - ||*F*<sub>c</sub>|| / Σ||*F*<sub>o</sub>||; <sup>[b]</sup>*wR*<sub>2</sub> = [Σ*w*(*F*<sub>o</sub><sup>2</sup> - *F*<sub>c</sub><sup>2</sup>)<sup>2</sup>] / Σ*w*(*F*<sub>o</sub><sup>2</sup>)<sup>2</sup>]<sup>1/2</sup>; <sup>[c]</sup>maximum and minimum residual electron density.

**Table S3.** The *T*<sub>c</sub> based on organic, inorganic and other hybrid perovskite ferroelectrics and reported cases of this work.

| Compound | <i>T</i> <sub>c</sub> / Ref. |
|----------|------------------------------|
|----------|------------------------------|

| K                                                  |     |           |
|----------------------------------------------------|-----|-----------|
| Hybrid rare-earth double ferroelectrics            |     |           |
| $(RM3HQ)_2RbLa(NO_3)_6$                            | 278 | 49        |
| $(RM3HQ)_2RbPr(NO_3)_6$                            | 280 | 41        |
| $(RM3HQ)_2RbEu(NO_3)_6$                            | 285 | 50        |
| $(R3HQ)_4KCe(NO_3)_8$                              | 323 | 39        |
| $(R3HQ)_4KNd(NO_3)_8$                              | 317 | 6         |
| $(R3HQ)_4RbCe(NO_3)_8$                             | 285 | 52        |
| $(HQ)_4KEu(NO_3)_8$                                | 291 | 53        |
| $(S3HQ)_4EuRb(NO_3)_8$                             | 94  | 54        |
| $[(R)-CM3HQ]_2CsEu(NO_3)_6$                        | 344 | 55        |
| $[R-3-HDMP]_2RbSm(NO_3)_6$                         | 251 | 56        |
| $(RM3HQ)_4K_2[Nd(NO_3)_6]_2$                       | 410 | This work |
| Hybrid double ferroelectrics                       |     |           |
| $(3\text{-Hydroxypyrrolidinium})_2RbBiBr_6$        | 432 | 51        |
| $(R3HP)_2RbBiBr_6$                                 | 485 | 15        |
| $[(CH_3)_3NOH]_2[KCo(CN)_6]$                       | 416 | 10        |
| $[(CH_3)_3NOH]_2[KFe(CN)_6]$                       | 406 | 10        |
| $(R-3P)_2KBiCl_6$                                  | 392 | 51        |
| $(\text{chloropropylammonium})_4AgBiBr_8$          | 305 | 57        |
| $(3,3\text{-difluorocyclobutanaminium})_4AgInBr_8$ | 230 | 58        |
| $[CH_2CIN(CH_3)_3]_2NaRuCl_6$                      | 320 | 59        |
| $(FCH_2CH_2NH_3)_2[KFe(CN)_6]$                     | 390 | 60        |

**Table S4.** Selected bond lengths [ $\text{\AA}$ ] and angles [ $^\circ$ ] at 293 K, 390 K, and 428 K.

| 293 K         |          |                      |            |
|---------------|----------|----------------------|------------|
| Nd(01)–O(005) | 2.647(5) | O(005)–Nd(01)–O(006) | 115.64(15) |
| Nd(01)–O(006) | 2.697(5) | O(007)–Nd(01)–O(005) | 177.23(17) |
| Nd(01)–O(007) | 2.590(5) | O(007)–Nd(01)–O(006) | 63.19(16)  |
| Nd(01)–O(008) | 2.570(5) | O(007)–Nd(01)–O(009) | 69.89(16)  |
| Nd(01)–O(009) | 2.592(5) | O(007)–Nd(01)–O(00A) | 116.40(16) |
| Nd(01)–O(00A) | 2.605(4) | O(007)–Nd(01)–O(00C) | 71.46(16)  |
| Nd(01)–O(00C) | 2.615(5) | O(007)–Nd(01)–O(00F) | 131.89(16) |
| Nd(01)–O(00F) | 2.638(4) | O(007)–Nd(01)–O(00G) | 65.06(17)  |
| Nd(01)–O(00G) | 2.633(5) | O(007)–Nd(01)–O(00I) | 113.27(16) |
| Nd(01)–O(00I) | 2.603(5) | O(007)–Nd(01)–O(00U) | 113.41(17) |
| Nd(01)–O(00P) | 2.565(5) | O(008)–Nd(01)–O(005) | 67.08(15)  |

|                 |          |                      |            |
|-----------------|----------|----------------------|------------|
| Nd(01)–O(00U)   | 2.591(5) | O(008)–Nd(01)–O(006) | 69.99(16)  |
| Nd(02)–O(00E)   | 2.607(6) | O(008)–Nd(01)–O(007) | 110.21(16) |
| Nd(02)–O(00J)   | 2.611(5) | O(008)–Nd(01)–O(009) | 110.74(15) |
| Nd(02)–O(00Q)   | 2.614(5) | O(008)–Nd(01)–O(00A) | 127.91(15) |
| Nd(02)–O(00R)   | 2.606(6) | O(008)–Nd(01)–O(00C) | 175.07(16) |
| Nd(02)–O(00T)   | 2.582(6) | O(008)–Nd(01)–O(00F) | 64.74(15)  |
| Nd(02)–O(00V)   | 2.610(5) | O(008)–Nd(01)–O(00G) | 49.27(16)  |
| Nd(02)–O(012)   | 2.606(5) | O(008)–Nd(01)–O(00I) | 69.80(15)  |
| Nd(02)–O(014)   | 2.618(5) | O(008)–Nd(01)–O(00U) | 114.47(16) |
| Nd(02)–O(016)   | 2.648(6) | O(009)–Nd(01)–O(005) | 111.37(15) |
| Nd(02)–O(018)   | 2.588(5) | O(009)–Nd(01)–O(006) | 47.83(15)  |
| Nd(02)–O(01D)   | 2.648(5) | O(009)–Nd(01)–O(00A) | 67.55(15)  |
| Nd(02)–O(01E)   | 2.571(6) | (01E)–Nd(02)–O(01D)  | 175.97(18) |
| K(003)–O(00B)   | 2.925(5) | O(010)–K(003)–O(00B) | 75.90(18)  |
| K(003)–O(00L)   | 2.824(5) | N(00Z)–O(009)–Nd(01) | 99.4(4)    |
| K(003)–O(010)   | 2.780(6) | N(00Y)–O(00A)–Nd(01) | 98.5(3)    |
| K(003)–O(016)#1 | 3.024(6) | C(01C)–O(00B)–K(003) | 116.4(4)   |
| K(003)–O(018)#1 | 3.087(7) | N(00Y)–O(00C)–Nd(01) | 97.0(3)    |
| K(003)–O(01A)#2 | 2.830(6) | C(00X)–O(00D)–K(004) | 119.6(4)   |
| K(003)–O(01D)#1 | 3.026(6) | N(01L)–O(00E)–Nd(02) | 98.2(5)    |
| K(003)–O(01U)   | 2.820(6) | N(00W)–O(00F)–Nd(01) | 97.6(3)    |
| K(004)–O(006)#3 | 2.966(6) | O(010)–K(003)–O(00B) | 75.90(18)  |
| K(004)–O(007)#3 | 3.080(6) | N(00Z)–O(009)–Nd(01) | 99.4(4)    |
| K(004)–O(00D)   | 2.849(6) | N(00Y)–O(00A)–Nd(01) | 98.5(3)    |
| K(004)–O(00G)#3 | 3.018(6) | C(01C)–O(00B)–K(003) | 116.4(4)   |
| K(004)–O(00H)#2 | 2.992(6) | N(00Y)–O(00C)–Nd(01) | 97.0(3)    |
| K(004)–O(00O)   | 2.813(6) | C(00X)–O(00D)–K(004) | 119.6(4)   |
| K(004)–O(019)#4 | 2.919(6) | N(01L)–O(00E)–Nd(02) | 98.2(5)    |
| K(004)–O(026)   | 2.812(8) | N(00W)–O(00F)–Nd(01) | 97.6(3)    |

---

Symmetry codes: #1:  $-x, 1-y, 1-z$ ; #2:  $1-x, 1-y, 2-z$ ; #3:  $-0.5+x, 0.5-y, -0.5+z$ ; #4:  $-0.5+x, 0.5-y, 0.5+z$ ; #5:  $0.5+x, 0.5-y, 0.5+z$ ; #6:  $0.5+x, 0.5-y, -0.5+z$ .

390 K

|                    |           |                       |           |
|--------------------|-----------|-----------------------|-----------|
| Nd(1)–O(1)         | 2.609(16) | O(22)#1–Nd(1)–O(1)    | 113.0(6)  |
| Nd(1)–O(4)         | 2.562(16) | O(22)#1–Nd(1)–O(6)    | 112.1(6)  |
| Nd(1)–O(6)         | 2.571(18) | O(22)#1–Nd(1)–O(12)   | 111.1(6)  |
| Nd(1)–O(12)        | 2.603(16) | O(22)#1–Nd(1)–O(16)#1 | 48.7(6)   |
| Nd(1)–O(16)#1      | 2.633(15) | O(22)#1–Nd(1)–O(2)    | 66.9(6)   |
| Nd(1)–O(22)#1      | 2.571(18) | O(22)#1–Nd(1)–O(19)   | 42.4(9)   |
| Nd(1)–O(2)         | 2.604(15) | O(22)#1–Nd(1)–O(11)#2 | 178.9(7)  |
| Nd(1)–O(9)         | 2.54(3)   | O(2)–Nd(1)–O(1)       | 110.6(5)  |
| Nd(1)–O(19)        | 2.61(3)   | O(2)–Nd(1)–O(12)      | 67.2(5)   |
| Nd(1)–O(5)         | 2.54(3)   | O(2)–Nd(1)–O(16)#1    | 69.3(6)   |
| Nd(1)–O(21)#2      | 2.56(2)   | O(2)–Nd(1)–O(19)      | 81.3(9)   |
| Nd(1)–O(11)#2      | 2.604(18) | O(2)–Nd(1)–O(11)#2    | 112.0(6)  |
| K(1)–O(1)#3        | 3.15(2)   | O(9)–Nd(1)–O(1)       | 89.8(9)   |
| K(1)–O(8)#3        | 3.11(3)   | O(9)–Nd(1)–O(12)      | 137.4(10) |
| K(1)–O(16)         | 2.960(17) | O(9)–Nd(1)–O(2)       | 147.7(10) |
| K(1)–O(18)         | 2.889(14) | O(9)–Nd(1)–O(19)      | 68.9(12)  |
| K(1)–O(20)         | 2.861(16) | O(9)–Nd(1)–O(5)       | 70.4(11)  |
| K(1)–O(3)#4        | 2.838(15) | O(9)–Nd(1)–O(11)#2    | 98.8(11)  |
| K(1)–O(13)         | 2.92(2)   | O(5)–Nd(1)–O(1)       | 145.9(10) |
| K(1)–H(13)         | 2.1498    | O(5)–Nd(1)–O(12)      | 144.1(8)  |
| K(1)–O(17)#3       | 3.16(4)   | O(5)–Nd(1)–O(2)       | 100.1(9)  |
| K(1)–O(23)         | 2.99(4)   | O(5)–Nd(1)–O(19)      | 49.8(11)  |
| O(1)–Nd(1)–O(12)   | 47.6(5)   | O(5)–Nd(1)–O(11)#2    | 88.3(9)   |
| O(1)–Nd(1)–O(16)#1 | 67.2(6)   | O(21)#2–Nd(1)–O(1)    | 109.6(8)  |
| O(1)–Nd(1)–O(19)   | 147.5(8)  | O(22)#1–Nd(1)–O(1)    | 113.0(6)  |
| O(1)–Nd(1)–O(11)#2 | 67.1(7)   | O(22)#1–Nd(1)–O(6)    | 112.1(6)  |
| O(4)–Nd(1)–O(1)    | 176.7(6)  | O(22)#1–Nd(1)–O(12)   | 111.1(6)  |

|                     |           |                       |           |
|---------------------|-----------|-----------------------|-----------|
| O(4)–Nd(1)–O(6)     | 114.1(7)  | O(22)#1–Nd(1)–O(16)#1 | 48.7(6)   |
| O(4)–Nd(1)–O(12)    | 129.1(6)  | O(22)#1–Nd(1)–O(2)    | 66.9(6)   |
| O(4)–Nd(1)–O(16)#1  | 112.8(7)  | O(22)#1–Nd(1)–O(19)   | 42.4(9)   |
| O(4)–Nd(1)–O(22)#1  | 68.1(6)   | O(22)#1–Nd(1)–O(11)#2 | 178.9(7)  |
| O(4)–Nd(1)–O(2)     | 66.7(6)   | O(2)–Nd(1)–O(1)       | 110.6(5)  |
| O(4)–Nd(1)–O(11)#2  | 111.7(7)  | O(2)–Nd(1)–O(12)      | 67.2(5)   |
| O(6)–Nd(1)–O(1)     | 68.6(6)   | O(2)–Nd(1)–O(16)#1    | 69.3(6)   |
| O(6)–Nd(1)–O(12)    | 112.5(6)  | O(2)–Nd(1)–O(19)      | 81.3(9)   |
| O(6)–Nd(1)–O(16)#1  | 109.2(6)  | O(2)–Nd(1)–O(11)#2    | 112.0(6)  |
| O(6)–Nd(1)–O(2)     | 178.5(6)  | O(9)–Nd(1)–O(1)       | 89.8(9)   |
| O(6)–Nd(1)–O(11)#2  | 69.0(7)   | O(9)–Nd(1)–O(12)      | 137.4(10) |
| O(12)–Nd(1)–O(16)#1 | 68.3(6)   | O(9)–Nd(1)–O(2)       | 147.7(10) |
| O(12)–Nd(1)–O(19)   | 146.7(10) | O(9)–Nd(1)–O(19)      | 68.9(12)  |

Symmetry codes: #1: 2–x, 2–y, 1–z; #2: 2–x, +y, 1–z; #3: +x, 2–y, +z; #4: +x, 1–y, +z; #5: 1–x, +y, –z; #6: 1–x, 1–y, –z; #7: 1–x, +y, 1–z; #8: 1–x, –y, 1–z; #9: +x, –y, +z; #10: 1–x, 1–y, 1–z.

428 K

|               |           |                       |          |
|---------------|-----------|-----------------------|----------|
| Nd(1)–O(15)#1 | 2.59(2)   | O(15)#1–Nd(1)–O(15)#2 | 104.1(9) |
| Nd(1)–O(15)#2 | 2.59(2)   | O(15)#1–Nd(1)–O(15)#3 | 104.1(9) |
| Nd(1)–O(15)#3 | 2.59(2)   | O(15)#2–Nd(1)–O(15)#3 | 104.1(9) |
| Nd(1)–O(8)#1  | 2.592(16) | O(15)#1–Nd(1)–O(8)#1  | 34.1(8)  |
| Nd(1)–O(8)#2  | 2.592(16) | O(15)#2–Nd(1)–O(8)#1  | 76.9(8)  |
| Nd(1)–O(8)#3  | 2.592(16) | O(15)#3–Nd(1)–O(8)#1  | 131.0(9) |
| Nd(1)–O(1)#4  | 2.604(16) | O(15)#1–Nd(1)–O(8)#2  | 131.0(9) |
| Nd(1)–O(1)    | 2.604(16) | O(15)#2–Nd(1)–O(8)#2  | 34.1(8)  |
| Nd(1)–O(1)#5  | 2.604(16) | O(15)#3–Nd(1)–O(8)#2  | 76.9(8)  |
| Nd(1)–O(7)    | 2.60(2)   | O(8)#1–Nd(1)–O(8)#2   | 110.2(5) |
| Nd(1)–O(7)#5  | 2.60(2)   | O(15)#1–Nd(1)–O(8)#3  | 76.9(8)  |
| Nd(1)–O(7)#4  | 2.60(2)   | O(15)#2–Nd(1)–O(8)#3  | 131.0(9) |
| Nd(1)–O(2)#4  | 2.611(13) | O(15)#3–Nd(1)–O(8)#3  | 34.1(8)  |

|               |           |                      |           |
|---------------|-----------|----------------------|-----------|
| Nd(1)–O(2)#5  | 2.611(13) | O(8)#1–Nd(1)–O(8)#3  | 110.2(5)  |
| Nd(1)–O(2)    | 2.611(13) | O(8)#2–Nd(1)–O(8)#3  | 110.2(5)  |
| Nd(1)–O(9)    | 2.61(3)   | O(15)#1–Nd(1)–O(1)#4 | 135.1(8)  |
| Nd(1)–O(9)#4  | 2.61(3)   | O(15)#2–Nd(1)–O(1)#4 | 119.7(10) |
| Nd(1)–O(9)#5  | 2.61(3)   | O(15)#3–Nd(1)–O(1)#4 | 76.3(9)   |
| K(2)–O(4)#4   | 2.860(19) | O(8)#1–Nd(1)–O(1)#4  | 146.5(6)  |
| K(2)–O(4)     | 2.860(19) | O(8)#2–Nd(1)–O(1)#4  | 93.4(6)   |
| K(2)–O(4)#5   | 2.860(19) | O(8)#3–Nd(1)–O(1)#4  | 81.7(7)   |
| K(2)–O(6)#4   | 2.99(8)   | O(15)#1–Nd(1)–O(1)   | 119.7(10) |
| K(2)–O(6)#5   | 2.99(8)   | O(15)#2–Nd(1)–O(1)   | 76.3(9)   |
| K(2)–O(6)     | 2.99(8)   | O(15)#3–Nd(1)–O(1)   | 135.1(8)  |
| K(2)–O(2)     | 3.087(15) | O(8)#1–Nd(1)–O(1)    | 93.4(6)   |
| K(2)–O(2)#4   | 3.087(16) | O(8)#2–Nd(1)–O(1)    | 81.7(7)   |
| K(2)–O(2)#5   | 3.087(15) | O(8)#3–Nd(1)–O(1)    | 146.5(6)  |
| K(2)–O(1)#4   | 3.106(18) | O(1)#4–Nd(1)–O(1)    | 66.0(7)   |
| K(2)–O(1)#5   | 3.106(18) | O(15)#1–Nd(1)–O(1)#5 | 76.3(9)   |
| K(2)–O(1)     | 3.106(18) | O(15)#2–Nd(1)–O(1)#5 | 135.1(8)  |
| O(1)–N(2)     | 1.209(18) | O(15)#3–Nd(1)–O(1)#5 | 119.7(10) |
| O(2)–N(2)     | 1.209(17) | O(8)#1–Nd(1)–O(1)#5  | 81.7(7)   |
| N(3)–O(15)    | 1.09(3)   | O(8)#2–Nd(1)–O(1)#5  | 146.5(6)  |
| N(3)–O(4)     | 1.20(3)   | O(8)#3–Nd(1)–O(1)#5  | 93.4(6)   |
| N(3)–O(8)     | 1.26(3)   | O(1)#4–Nd(1)–O(1)#5  | 66.0(7)   |
| O(8)–O(15)    | 1.52(3)   | O(1)–Nd(1)–O(1)#5    | 66.0(7)   |
| O(8)–Nd(1)#6  | 2.592(16) | O(15)#1–Nd(1)–O(7)   | 100.6(8)  |
| O(15)–Nd(1)#6 | 2.59(2)   | O(15)#2–Nd(1)–O(7)   | 49.6(7)   |

Symmetry codes: #1: 2–x, 2–y, 1–z; #2: 2–x, +y, 1–z; #3: +x, 2–y, +z; #4: +x, 1–y, +z; #5: 1–x, +y, –z; #6: 1–x, 1–y, –z; #7: 1–x, +y, 1–z; #8: 1–x, –y, 1–z; #9: +x, –y, +z; #10: 1–x, 1–y, 1–z.
